# Supplementary material for: In situ growth of NiCo-MOF and the derived NiCo2O4/NiCo2O4/Ni foam composite with a wire-penetrated-cage hierarchical architecture for an efficient oxygen evolution reaction
Source: Royal Society of Chemistry journal article supplement (doi:10.1039/d3dt02985a), 2023-01-01
Supplement: d3dt02985a1.pdf [file d3dt02985a1.pdf]

## Supporting Information

### ***In-Situ* Growth of NiCo-MOF and the Derived NiCo<sub>2</sub>O<sub>4</sub>/NiCo<sub>2</sub>O<sub>4</sub>/Ni foam Composite with Wire-Penetrated- Cage Hierarchical Architectures for Efficient Oxygen Evolution Reaction**

Xianchun Liu,<sup>a</sup> Yan Xing<sup>\*a</sup>

<sup>a</sup> Jilin Provincial Key Laboratory of Advanced Energy Materials, Department of Chemistry, Northeast Normal University, 5268 Renmin Street, Changchun 130024, China

Corresponding Authors

\*E-mail: xingy202@nenu.edu.cn

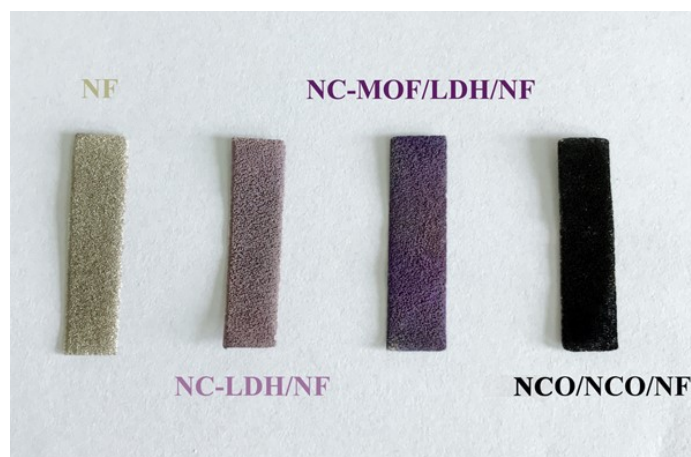

**Figure S1** Optical image of NF, NC-LDH/NF, NC-MOF/LDH/NF and NCO/NCO/NF electrode.

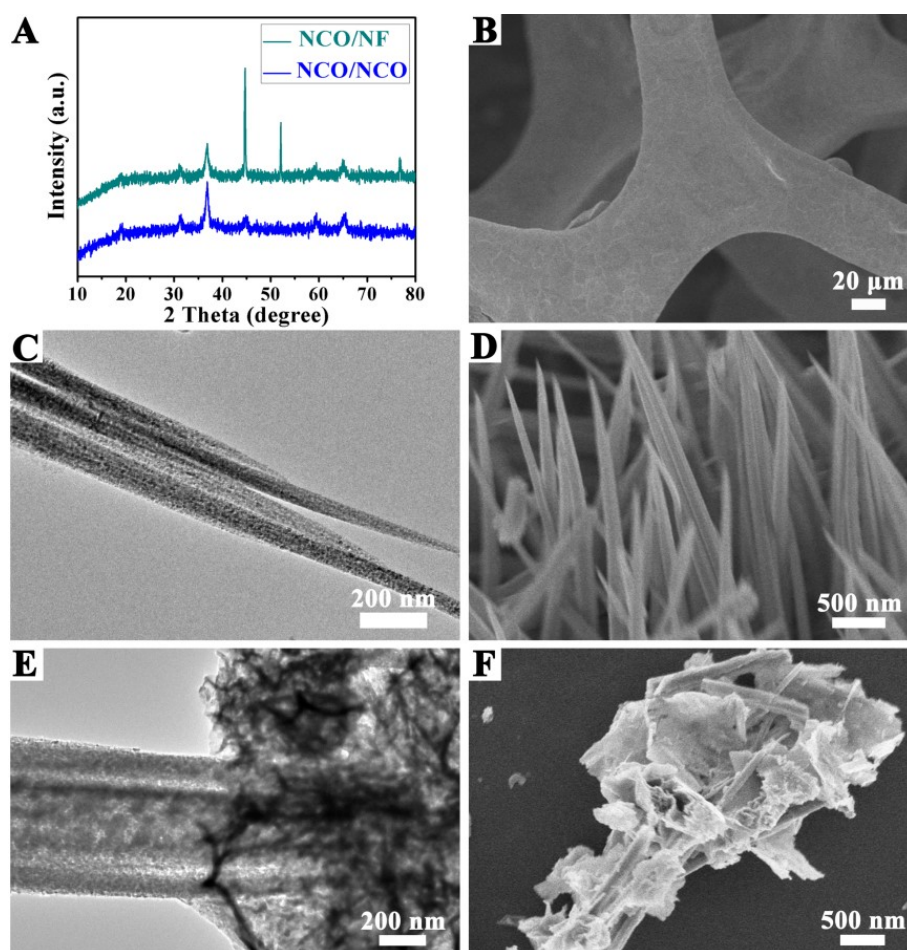

**Figure S2** (A) XRD patterns of the NCO/NF and NCO/NCO. (B) SEM image of NF. TEM and SEM images of (C, D) NCO/NF and (E, F) NCO/NCO.

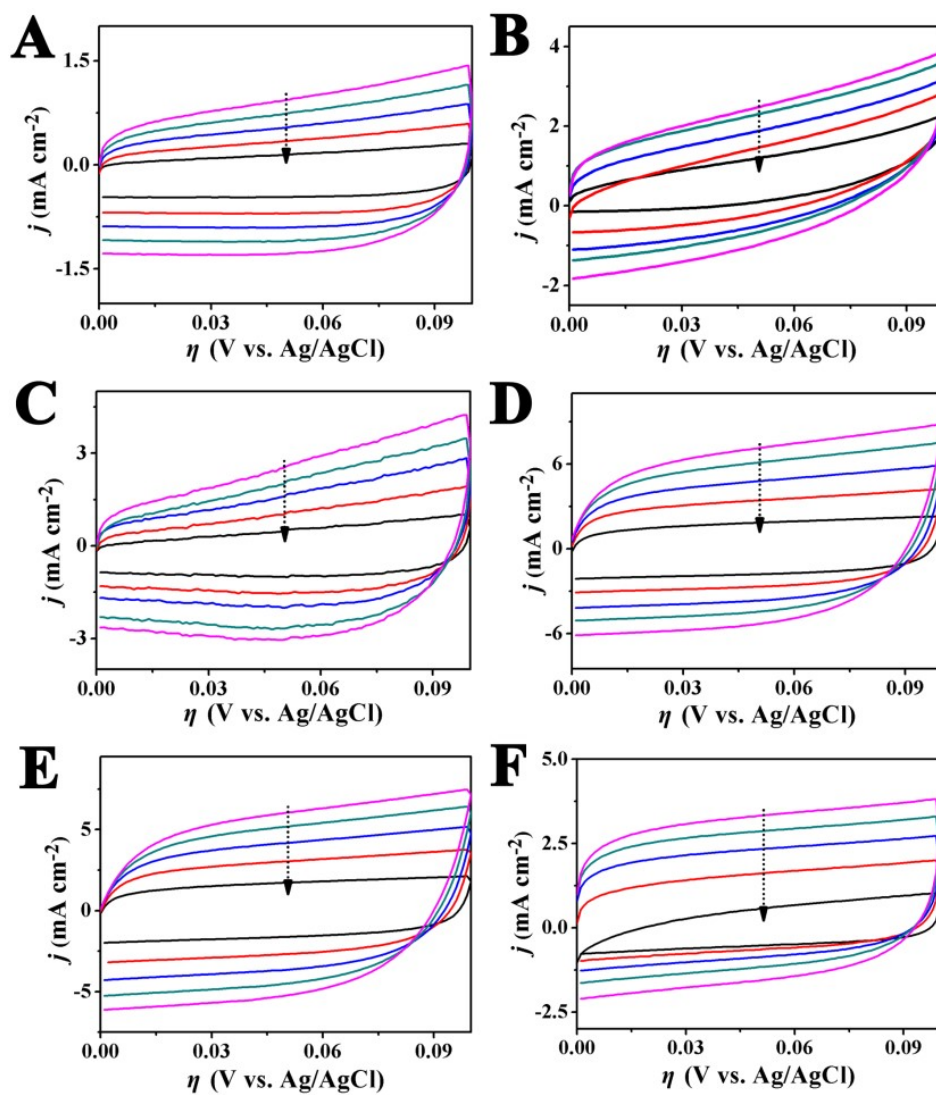

**Figure S3** CV curves of (A) NF, (B) NC-LDH/NF, (C) NC-MOF/LDH/NF, (D) NCO/NCO/NF, (E) NCO/NF and (F) NCO/NCO in the potential range of 0.00 to 0.10 V vs. Ag/AgCl (non-Faradaic region) at different scan rates (20 - 100  $\text{mV s}^{-1}$ ).

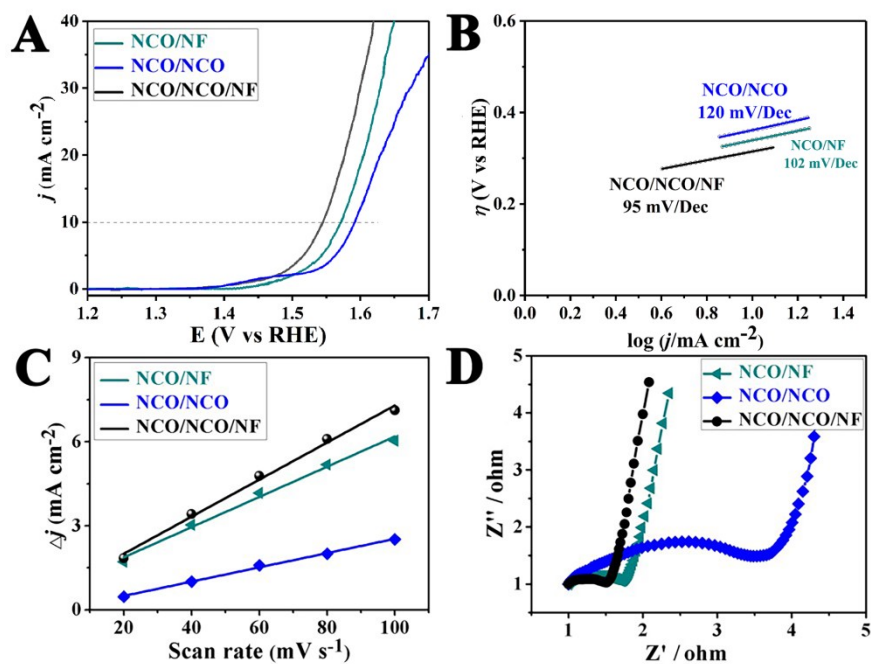

**Figure S4** (A) Linear scan voltammograms (LSV) plots, (B) Tafel plots, (C) the differences in current density plotted against scan rate for estimation of double-layer capacitance ( $C_{dl}$ ), and (D) Nyquist plots of the NCO/NF, NCO/NCO and NCO/NCO/NF in 0.1 M KOH.

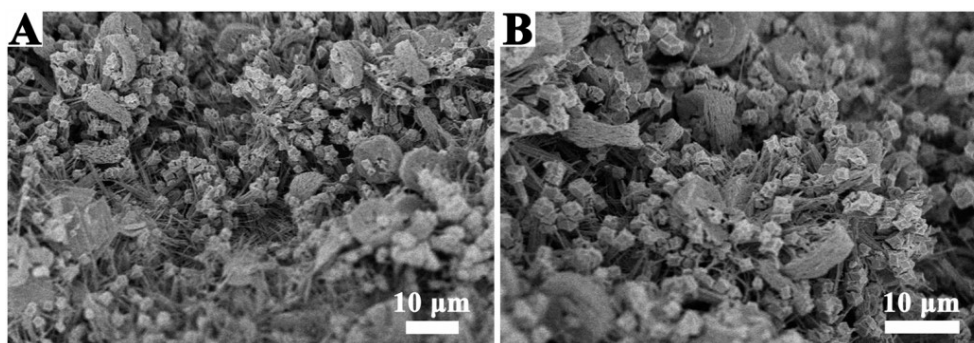

**Figure S5** SEM images of NCO/NCO/NF composite after 100 h of the catalytic oxidation reaction (A) and 2000 cycles (B), respectively.

**Table S1.** Comparison of OER activities for various NiCo<sub>2</sub>O<sub>4</sub> NWs based composites.

| Catalyst                                                                                 | Substrate <sup>[c]</sup> | <i>j</i><br>(mA<br>cm <sup>-2</sup> ) | <i>η</i><br>(mV) | Tafel slope<br>(mV Dec <sup>-1</sup> ) | Loading<br>amount of<br>catalyst<br>(mg cm <sup>-2</sup> ) | Ref.                 |
|------------------------------------------------------------------------------------------|--------------------------|---------------------------------------|------------------|----------------------------------------|------------------------------------------------------------|----------------------|
| NiCo@NiCoO <sub>2</sub> /C<br>PMRAs <sup>[a]</sup>                                       | CFC                      | 10                                    | 340              | 83.97                                  | 3.2                                                        | [1]                  |
| NiCo <sub>2</sub> O <sub>4</sub> /NiCo <sub>2</sub> O <sub>4</sub><br>NWs <sup>[a]</sup> | GO                       | 10                                    | 373              | 63.1                                   | --                                                         | [2]                  |
| MnO <sub>2</sub> /NiCo <sub>2</sub> O <sub>4</sub> /<br>NF <sup>[a]</sup>                | Ni foam                  | 10                                    | 340              | 139                                    | --                                                         | [3]                  |
| NiCo <sub>2</sub> O <sub>4</sub> /NiO/GO <sup>[a]</sup>                                  | GO                       | 10                                    | 350              | 66                                     | --                                                         | [4]                  |
| NiCo <sub>2</sub> O <sub>4</sub> NWs <sup>[a]</sup>                                      | Ni foam                  | 9.46                                  | 550              | 68                                     | --                                                         | [5]                  |
| Fe <sub>0.5</sub> Ni <sub>0.5</sub> Co <sub>2</sub> O <sub>4</sub><br>NWs <sup>[a]</sup> | Ni foam                  | 10                                    | 350              | 27                                     | --                                                         | [6]                  |
| NiCo <sub>2</sub> O <sub>4</sub> NWs <sup>[a]</sup>                                      | Ti foil                  | 0                                     | 500              | 62                                     | 0.33                                                       | [7]                  |
| NiCo <sub>2</sub> O <sub>4</sub> NA/CC <sup>[a]</sup>                                    | CC                       | 0                                     | 320              | 90                                     | 0.43                                                       | [8]                  |
| NiCo <sub>2</sub> O <sub>4</sub><br>nanoneedles <sup>[a]</sup>                           | FTO                      | 10                                    | 565              | 292                                    | 0.53                                                       | [9]                  |
| CFP/NCO/<br>Co <sub>0.57</sub> Ni <sub>0.43</sub> <sup>[b]</sup>                         | CFP                      | 10                                    | 340              | 63                                     | 1.477                                                      | [10]                 |
| NiMn-LDH/<br>NiCo <sub>2</sub> O <sub>4</sub> NWs <sup>[a]</sup>                         | Ni foam                  | 10                                    | 310              | 99                                     | 5.4                                                        | [11]                 |
| NiCo <sub>2</sub> O <sub>4</sub> NWs <sup>[a]</sup>                                      | Ni foam                  | 10                                    | 363              | 121                                    | 2.5                                                        | [11]                 |
| <b>NCO/NCO/NF<sup>[b]</sup></b>                                                          | <b>Ni foam</b>           | <b>10</b>                             | <b>320</b>       | <b>80</b>                              | <b>1</b>                                                   | <b>This<br/>work</b> |

All experiments are performed in 1.0 [a] and 0.1 [b] M KOH electrolyte, respectively. [c] CFC = Carbon Fiber Cloth GO = Graphite Oxide, GCE = Glassy Carbon Electrode, CC = Carbon Cloth, FTO = Fluorine doped Tin Oxide, CB = Carbon Black, CFP = Carbon Fiber Paper.

## References

1. H. Xu, Z. Shi, Y. Tong and G. Li, *Adv. Mater.*, 2018, *30*, 1705442.
2. R. Chen, H. Wang, J. Miao, H. Yang and B. Liu, *Nano Energy*, 2015, *11*, 333.
3. K. Yan, X. Shang, W. Gao, B. Dong, X. Li, J. Chi, Y. Liu, Y. Chai and C. Liu, *J. Alloys Comp.*, 2017, *719*, 314.
4. Y. Wang, Z. Zhang, X. Liu, F. Ding, P. Zou, X. Wang, Q. Zhao and H. Rao, *ACS*

- Sustainable Chem. Eng.*, 2018, **6**, 12511.
5. B. Lu, C. Wang, S. Chen, J. Yin, G. Wang and D. Cao, *J. Solid State Electrochem.*, 2013, **17**, 2277.
  6. K. Yan, X. Shang, Z. Li, B. Dong, X. Li, W. Gao, J. Chi, Y. Chai, C. Liu, *Appl. Surf. Sci.*, 2017, **416**, 371.
  7. Y. Su, Q. Xu, G. Chen, H. Cheng, N. Li and Z. Liu, *Electrochim Acta*, 2015, **174**, 1216.
  8. D. Liu, Q. Lu, Y. Luo, X. Sun and A. Asiri, *Nanoscale*, 2015, **7**, 15122.
  9. H. Shi and G. Zhao, *J. Phys. Chem. C*, 2014, **118**, 25939
  10. J. Yin, P. Zhou, L. An, L. Huang, C. Shao, J. Wang, H. Liu and P. Xi, *Nanoscale*, 2016, **8**, 1390.
  11. L. Yang, L. Chen, D. Yang, X. Yu, H. Xue, L. Feng, *J. Power Sources*, 2018, **392**, 23.
